# Supplementary material for: Targeted Deletion of the Metastasis-Associated Phosphatase Ptp4a3 (PRL-3) Suppresses Murine Colon Cancer
Source: PLOS journal article supplement (doi:10.1371/journal.pone.0058300), 2013-03-28

**Figure S2** - Male *Ptp4a3* knockout mice exhibited decreased weight and body mass index. A) When compared to wildtype littermates (n=9/genotype), male *Ptp4a3*<sup>-/-</sup> mice exhibited an average of ~10% less body mass (p<0.005). B) Mice were also measured from the nose to the base of the tail and body mass index was determined (BMI=kg/m<sup>2</sup>). Male *Ptp4a3*<sup>-/-</sup> littermates exhibited a ~7% decrease in BMI compared to wildtype (p<0.005). Neither of these phenotypes were significantly altered in female *Ptp4a3*<sup>-/-</sup> mice compared to wildtype.

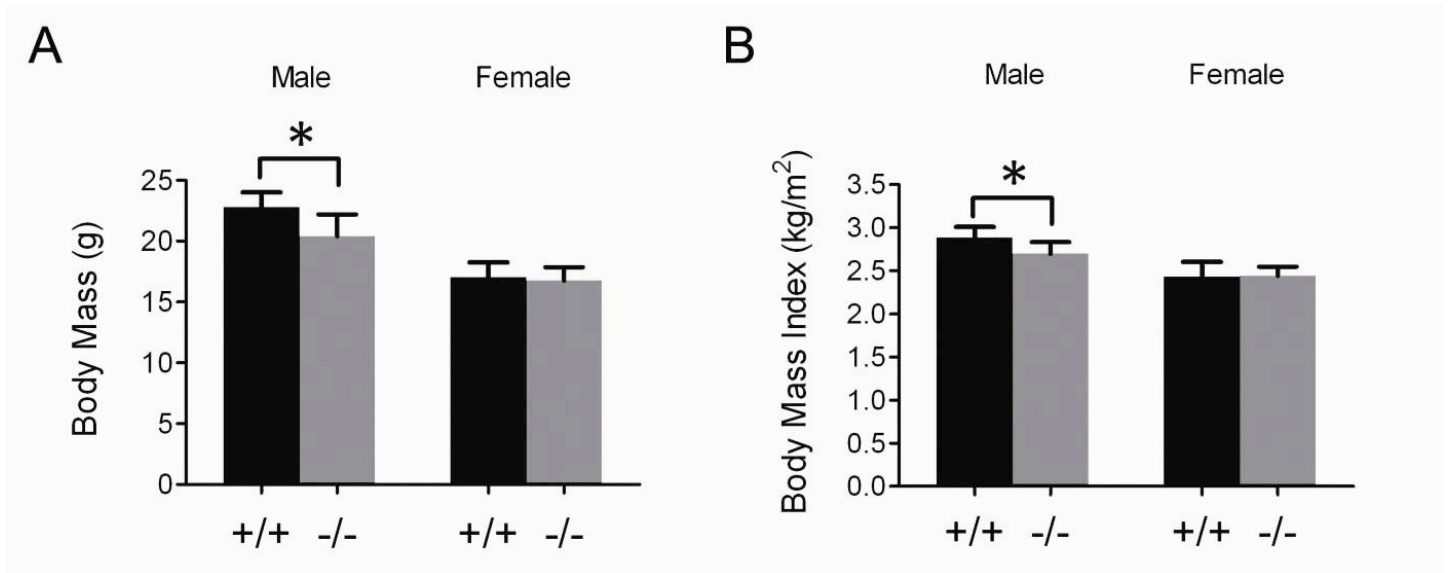

Supplement: S2 (10.1371/journal.pone.0058300.s002) [file journal.pone.0058300.s002]
