# Supplementary material for: Targeted Deletion of the Metastasis-Associated Phosphatase Ptp4a3 (PRL-3) Suppresses Murine Colon Cancer
Source: PLOS journal article supplement (doi:10.1371/journal.pone.0058300), 2013-03-28

**Figure S3** - Histological analysis of wildtype and *Ptp4a3*-null tissues. Freshly isolated tissues were submerged in 10% neutral buffered formalin (Sigma) and fixed at room temperature overnight. Tissues were dehydrated through an ethanol gradient, embedded in paraffin, and sectioned onto glass slides. Sections stained with hematoxylin and eosin appeared qualitatively similar between genotypes (bar=5  $\mu$ m).

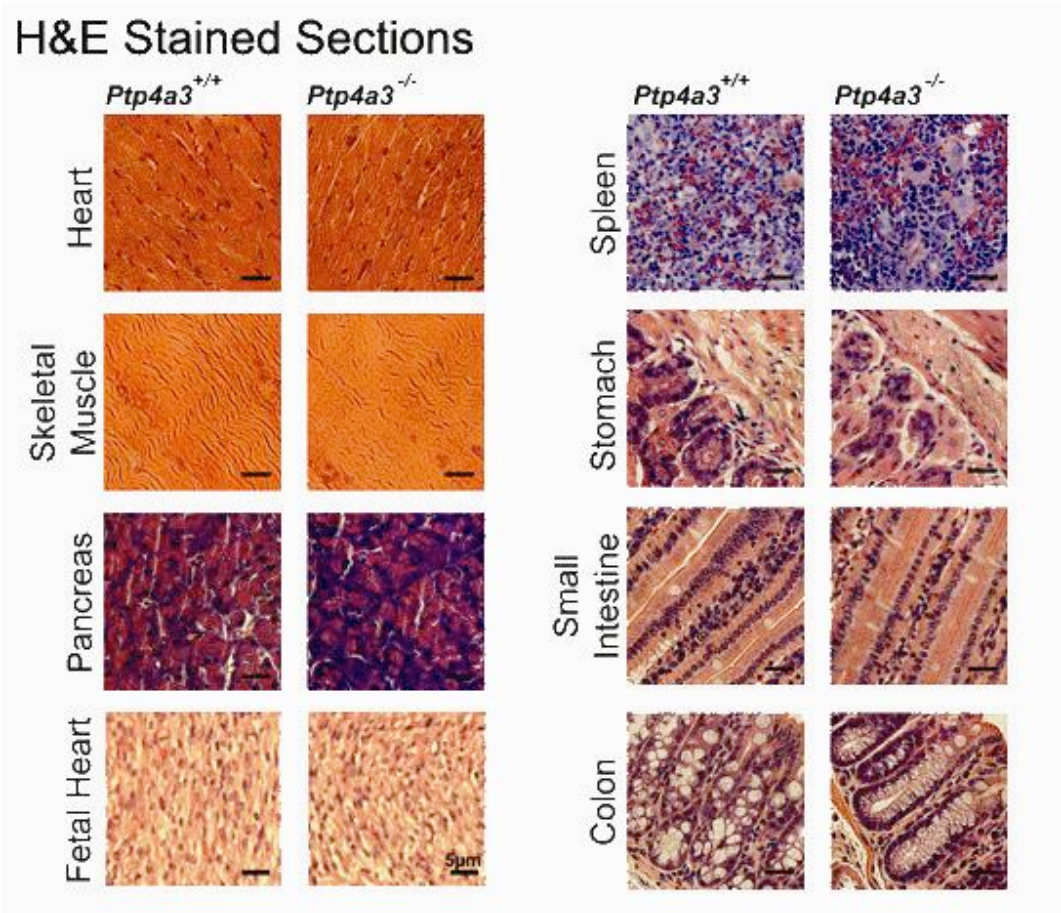

Supplement: S3 (10.1371/journal.pone.0058300.s003) [file journal.pone.0058300.s003]
